# Supplementary material for: The ototoxic drug cisplatin localises to stress granules altering their dynamics and composition
Source: PubMed Central journal article supplement (PMC10399988; doi:10.1242/jcs.260590), 2023-07-19
Supplement: joces-136-260590-s1.pdf [file joces-136-260590-s1.pdf]

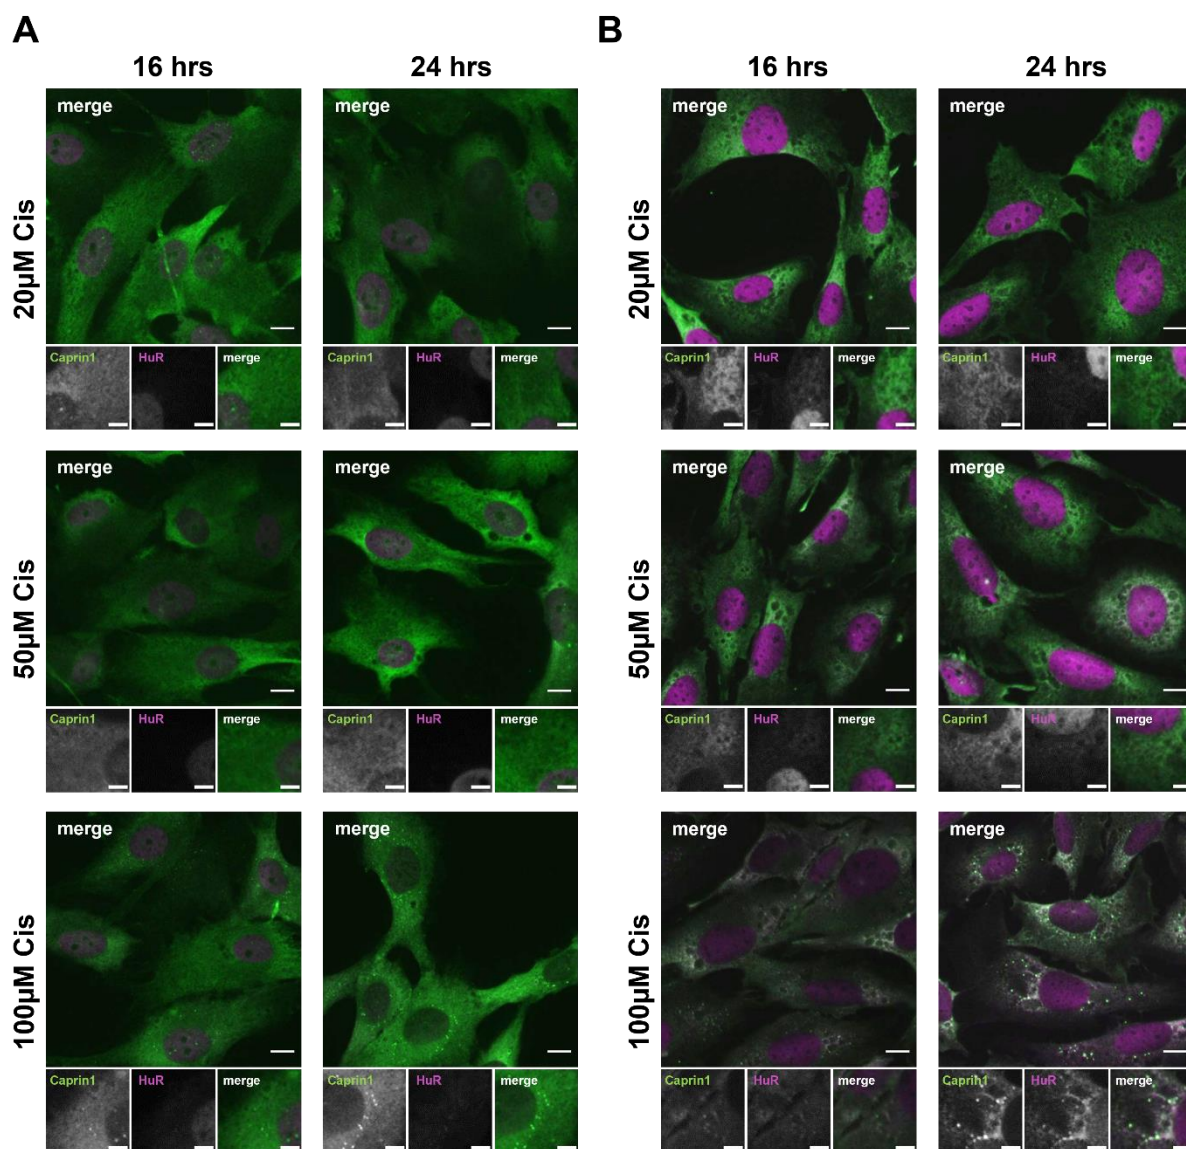

**Fig. S1. Treatment of cell lines over time with varying concentrations of cisplatin.** (A) OC2 and (B) RPE cells were treated for 16 or 24h with either 20, 50 or 100 μM cisplatin before fixation and immuno-staining with Caprin1 and HuR.

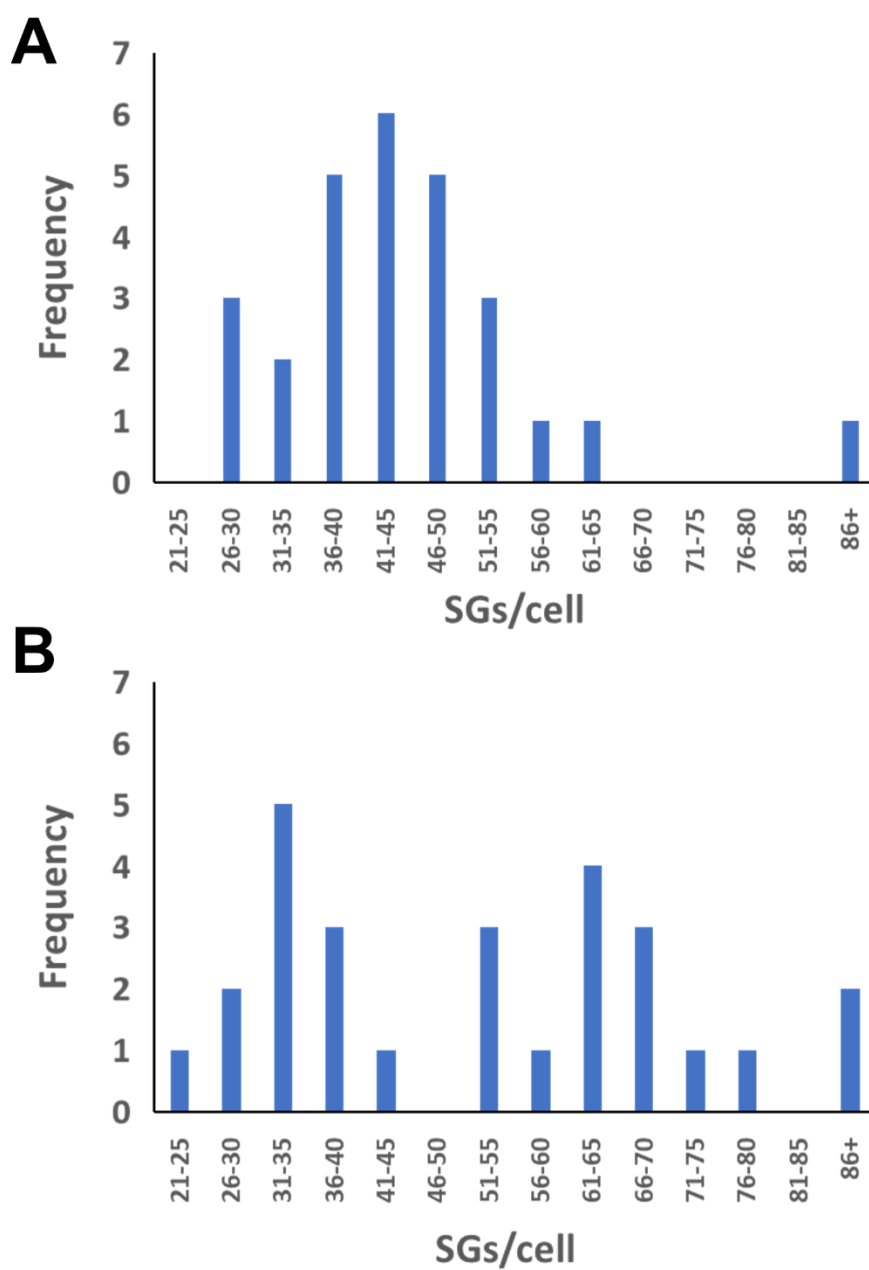

**Fig. S2. Frequency distribution for SG/cell in RPE cells.** Frequency distribution for SGs/cell in RPE cells treated with either arsenite (A) for 1h or pre-treated with 50µM cisplatin for 24h before arsenite (B).

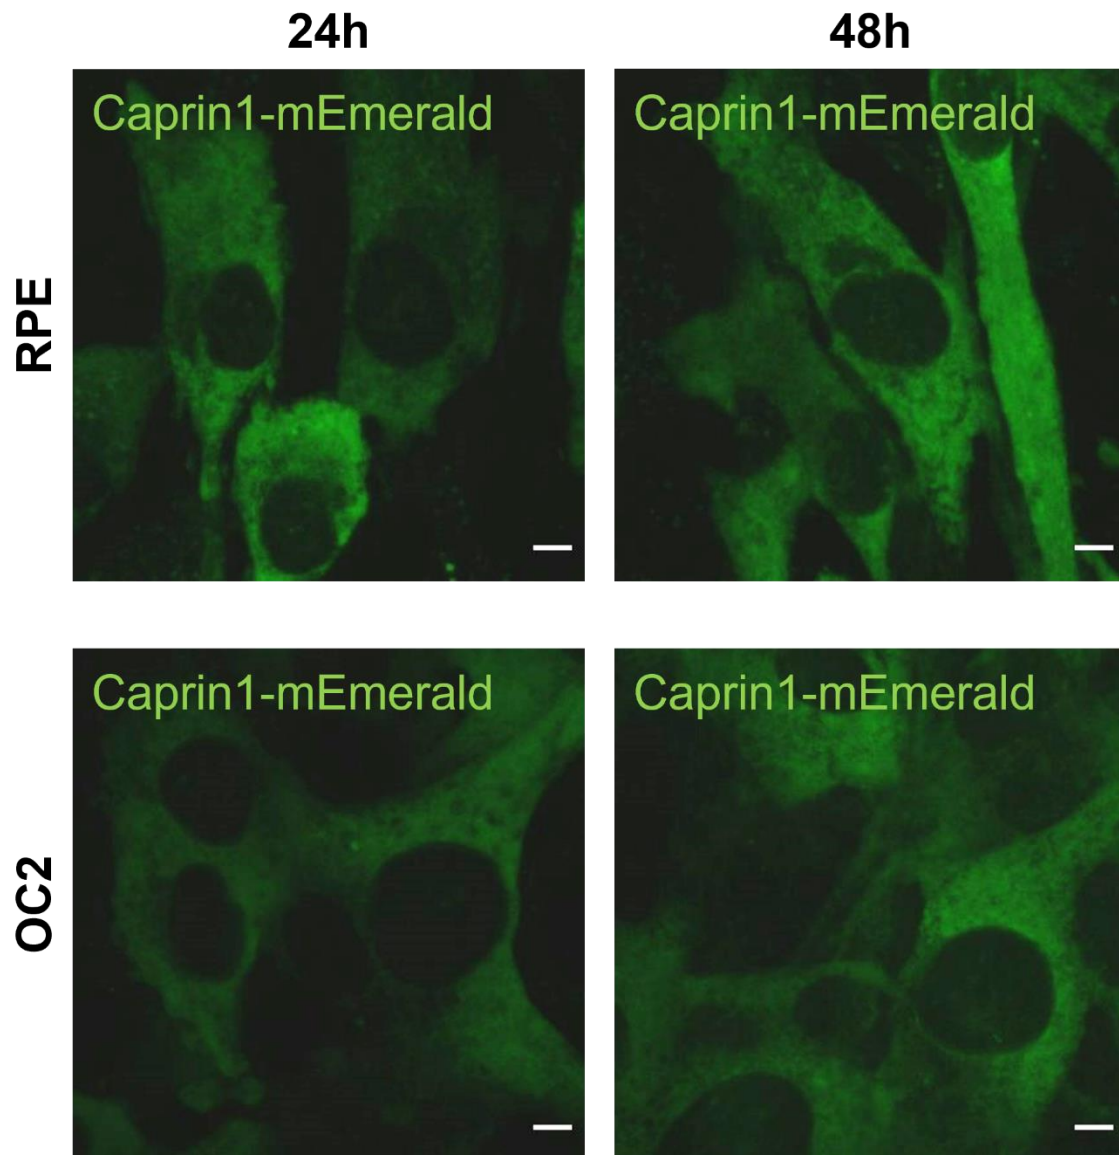

**Fig. S3. Caprin1mEmerald cell lines untreated at 24h and 48h.** RPE and OC2 cells stably expressing Caprin1-mEmerald at 24h and 48h.

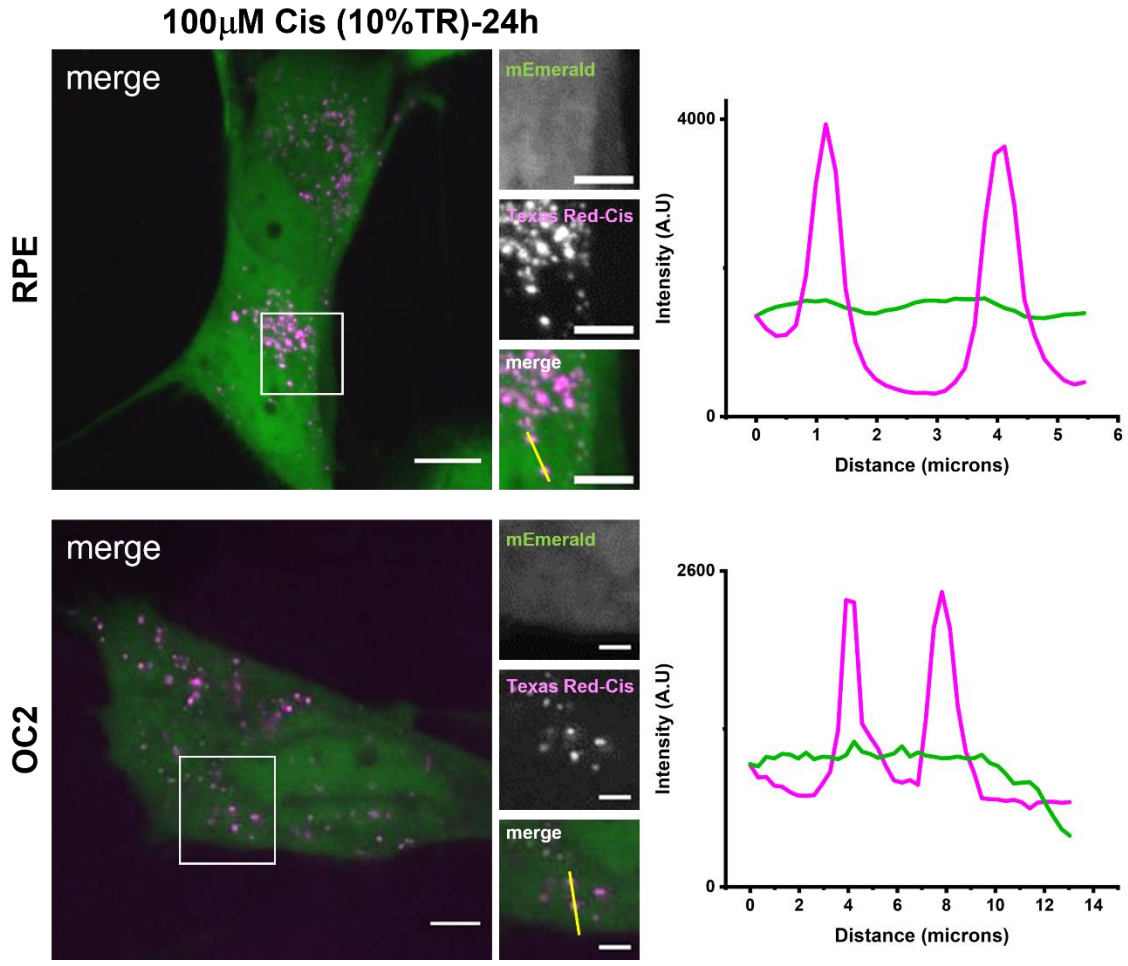

**Fig. S4. mEmerald cell lines treated with Texas Red cisplatin.** RPE and OC2 cells stably expressing mEmerald treated with 100 $\mu$ M cisplatin, 10% of which was Texas-red cisplatin for 24h. Profile plots show the signal intensity along the corresponding yellow line. Scale bars =10 $\mu$ m in large image and 5 $\mu$ m in zoomed.

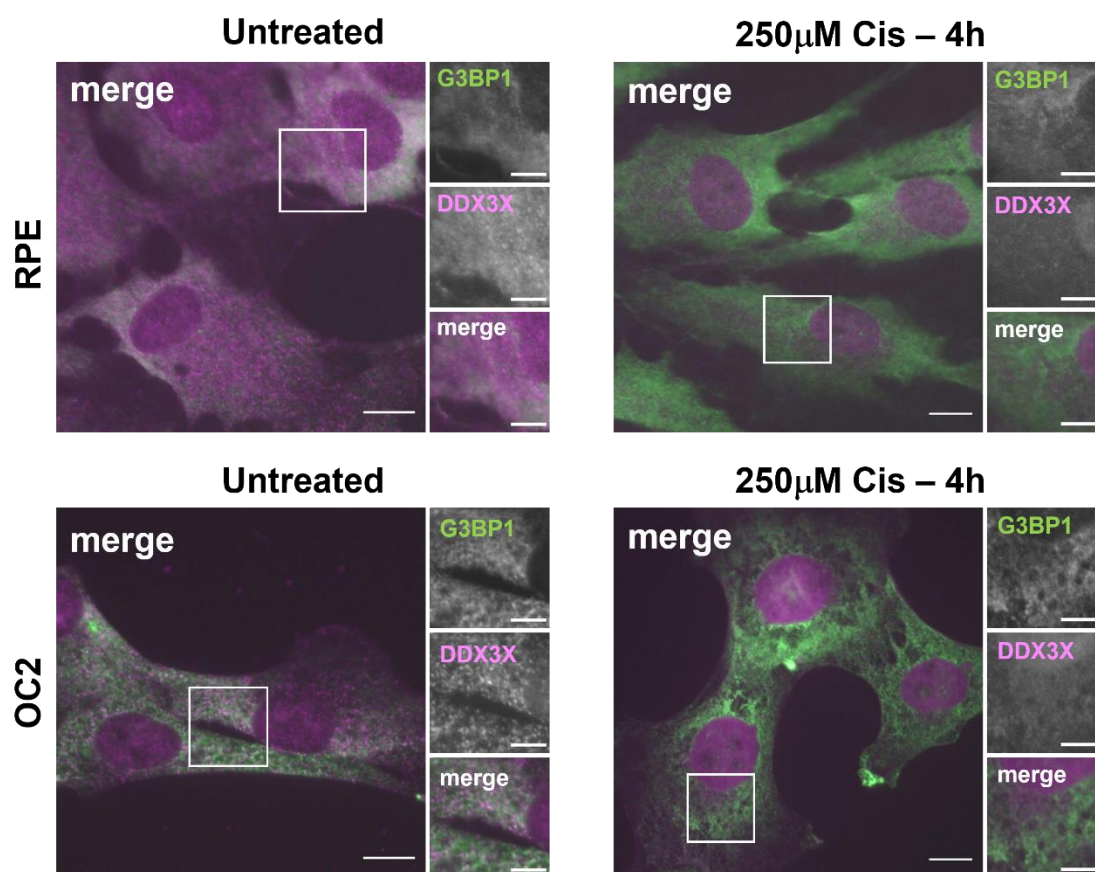

**Fig. S5. RPE and OC2 cells treated with 250µM cisplatin for 4h.** RPE and OC2 cells were treated with 250µM cisplatin for 4h before fixation and immuno-staining with G3BP1 and DDX3X.

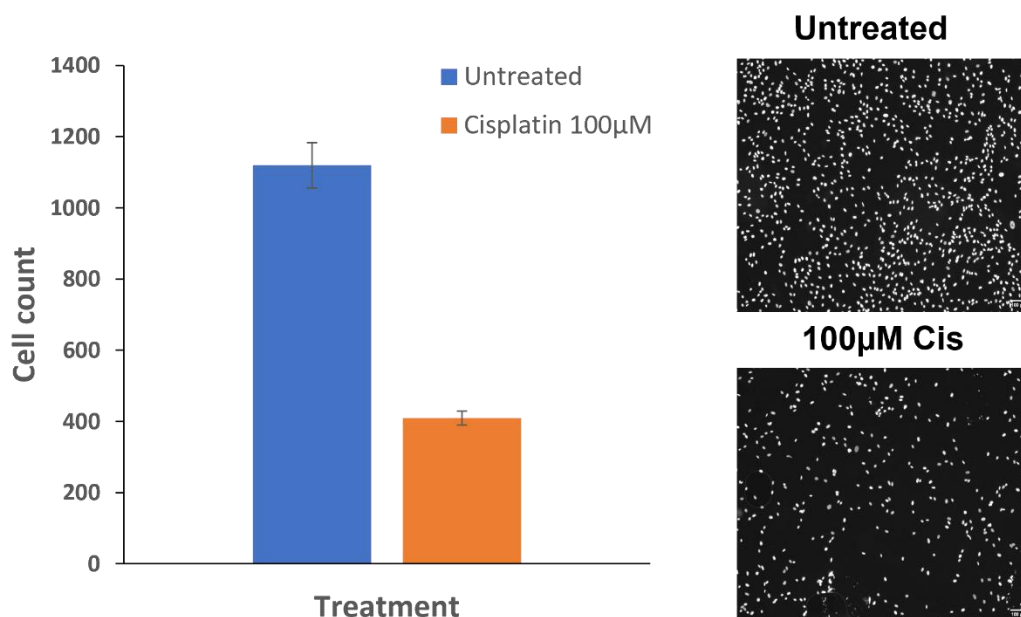

**Fig. S6. Cell count of cisplatin treated RPE cells.** RPE cells were treated with 100mM cisplatin for 24h before fixation. Cells were stained with DAPI and then 10x images per cover slip were collected and compared to untreated cells. N = 3.

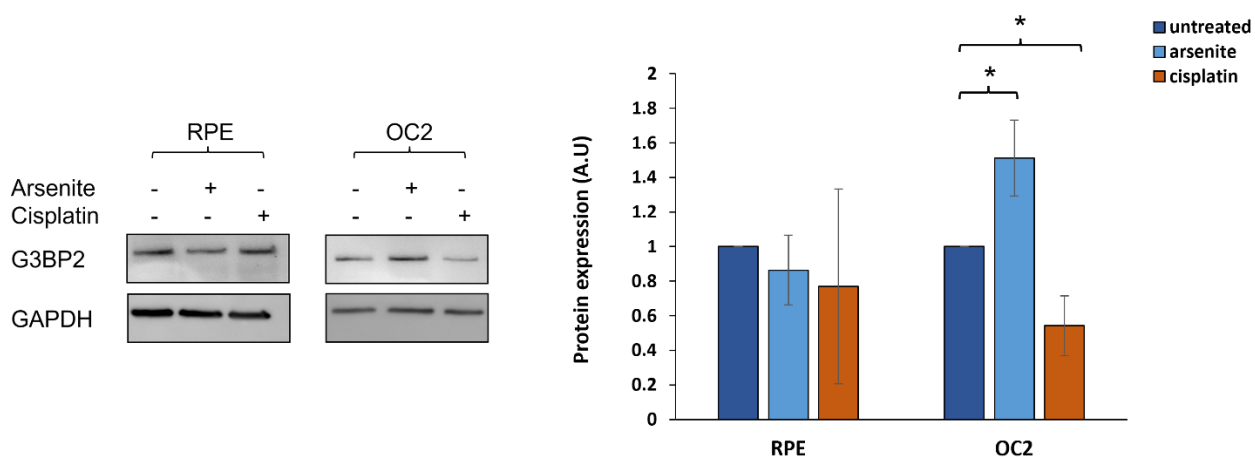

**Fig. S7. Levels of G3BP2 in RPE and OC2 cells.** Western blot of G3BP2 in untreated, arsenite and cisplatin treated cells. GAPDH used as loading control for densitometry analysis. Error bars represent SD. \*=  $p < 0.05$ . N=3.

A

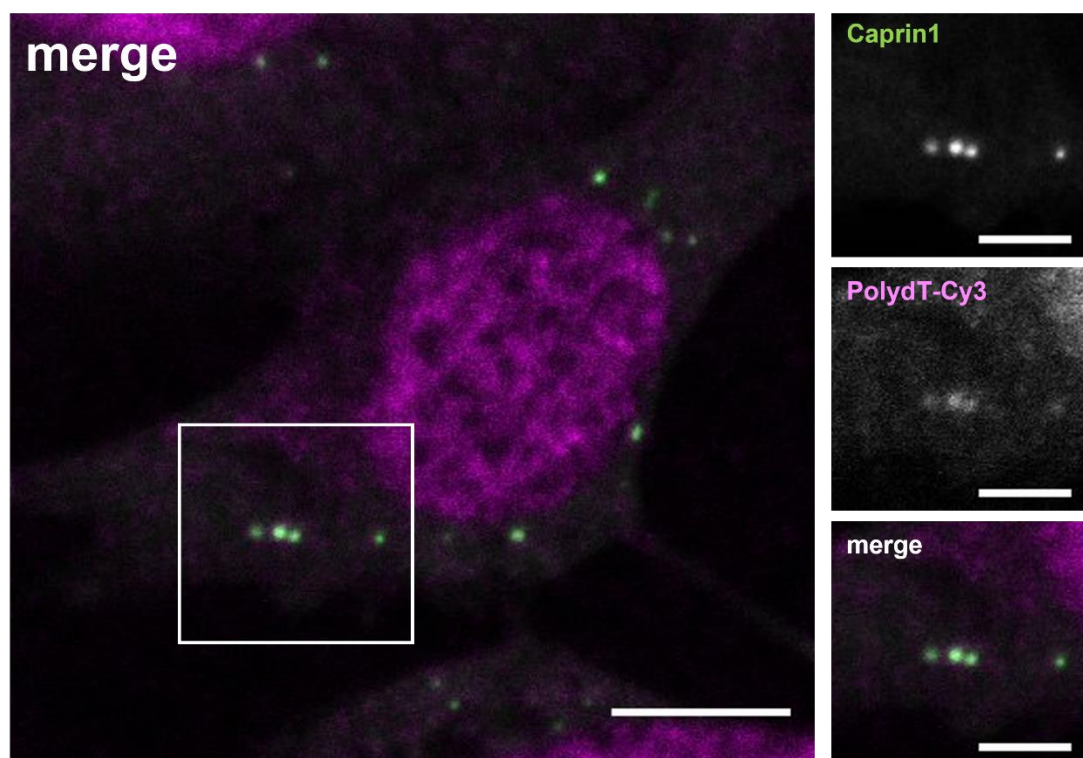

B

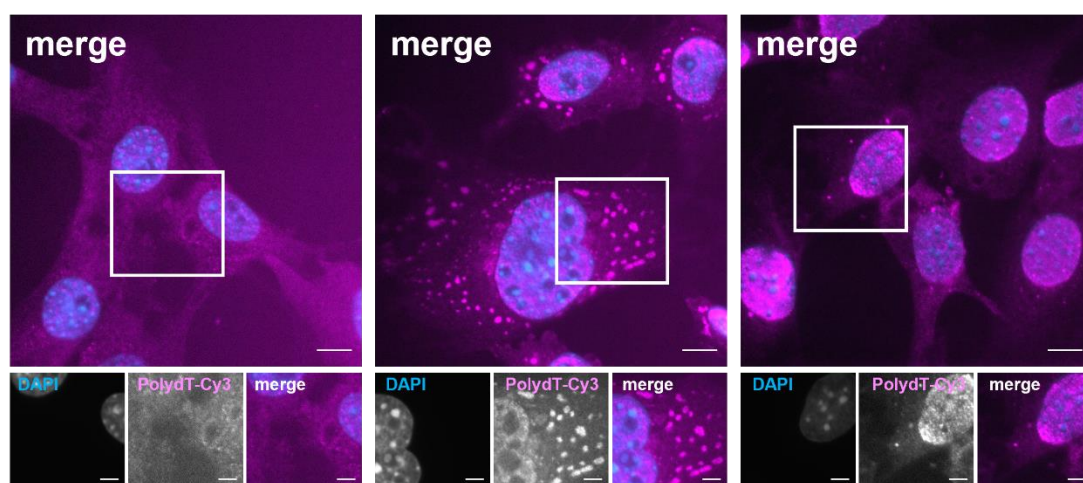

**Fig. S8.** RNA-ImmunoFISH images of cisplatin treated OC2 cells. (A) Cisplatin treated cells were imaged using a Zeiss 880 confocal microscope with Ex/Em filters that excluded crosstalk between AlexaFluor633 (641-723) and Cy3 (566-608). Scale bar in main image = 10 $\mu$ m, in small images = 5 $\mu$ m. (B) Cells were either left untreated or treated with 0.5mM sodium arsenite for 1h or 100 $\mu$ M cisplatin for 24h before RNA-ImmunoFISH. Immuno was performed without Caprin1 or GaR-633. Scale bar in main image = 10 $\mu$ m, in small images = 5 $\mu$ m.

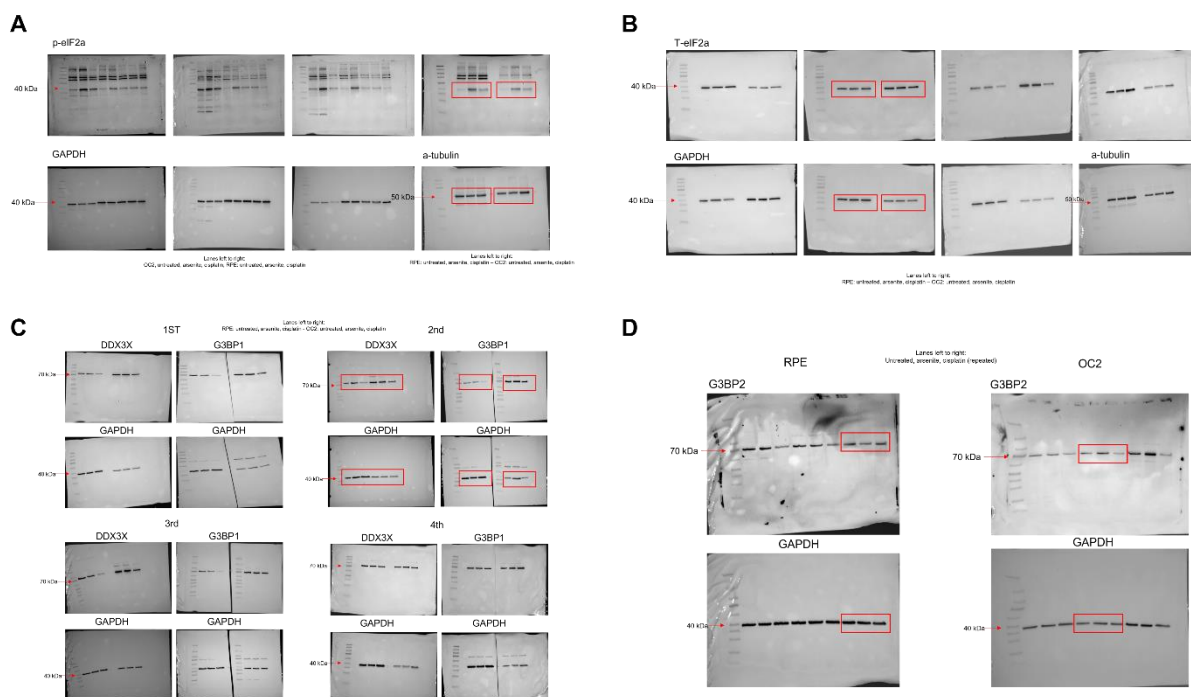

**Fig. S9. Blot transparency. Raw western blot data is provided for each corresponding figure.** (A) Raw blots for p-eIF2α with loading control GAPDH and α-tubulin. (B) Raw blots for total eIF2α with loading controls GAPDH and α-tubulin. (C) Raw blots for DDX3X and G3BP1 with loading control GAPDH. (D) Raw blots for G3BP2 and loading control GAPDH. Red boxes indicate data used in figures.
